# Supplementary material for: Immunolocalization of a Histidine-Rich Epidermal Differentiation Protein in the Chicken Supports the Hypothesis of an Evolutionary Developmental Link between the Embryonic Subperiderm and Feather Barbs and Barbules
Source: PubMed Central journal article supplement (PMC5147990; doi:10.1371/journal.pone.0167789), 2016-12-09

# A

>HRP/Fp\_partial (Presland et al. 1989)

attcgcttctctcgagttcctctctcgcggtgaaccgggtttccctccaacaaccagcaatg

# B

HRP/Fp cDNA (Presland et al., 1989) vs. *EDMTFH* gene (Gallus gallus 5.0)

## Exon 1:

```
EDMTFH 1 ttgagaggggtatataatacagacctcgagctccggagcttcattcgcttctctcgagttcc
HRP/Fp 1 -----attcgcttctctcgagttcc
```

```
EDMTFH 61 tctcctcgggtgaaccgggtaagtccacactgcctatactctactcttcttgatagtctt
HRP/Fp 21 tctcctcgggtgaaccgg-----
```

## Exon 2:

```
EDMTFH 771 gttccctgctgtgtgtttcaggtttccctccaacaaccagcaatgactttccacagggaa
HRP/Fp 38 -----gttccctccaacaaccagcaatg-----
```

# C

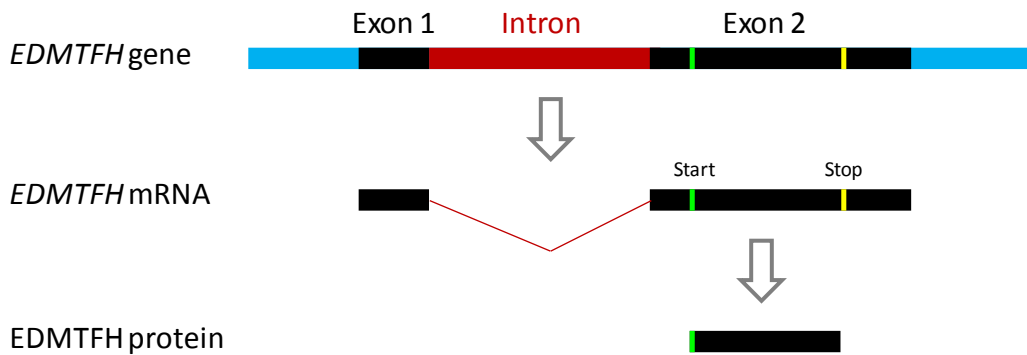

Supplement: pone.0167789.s001.pdf [file pone.0167789.s001.pdf]
