# Supplementary material for: Immunolocalization of a Histidine-Rich Epidermal Differentiation Protein in the Chicken Supports the Hypothesis of an Evolutionary Developmental Link between the Embryonic Subperiderm and Feather Barbs and Barbules
Source: PubMed Central journal article supplement (PMC5147990; doi:10.1371/journal.pone.0167789), 2016-12-09

kDa

250

150

100

75

50

37

25

20

15

10

anti-EDMTFH

neg. control

Ponceau

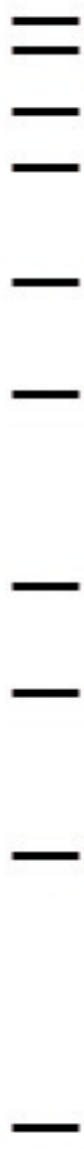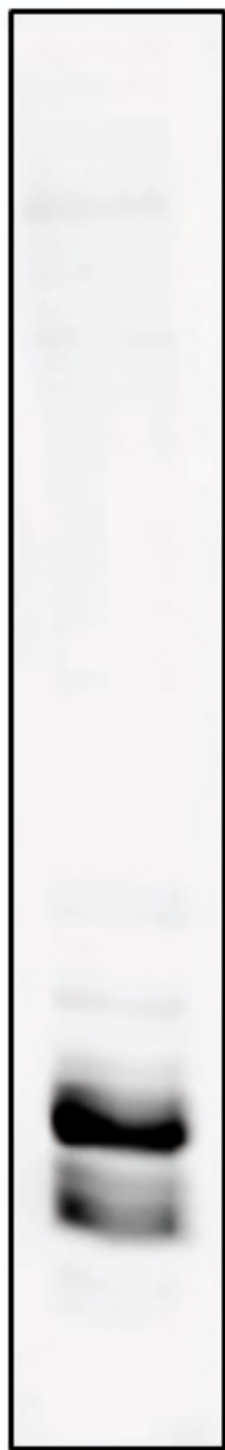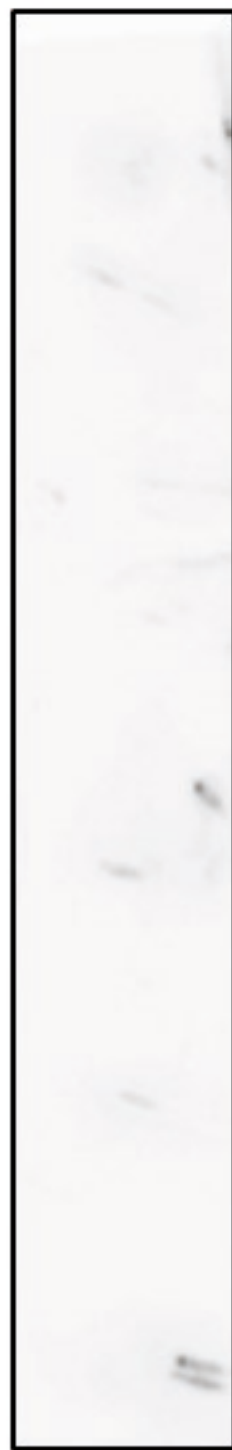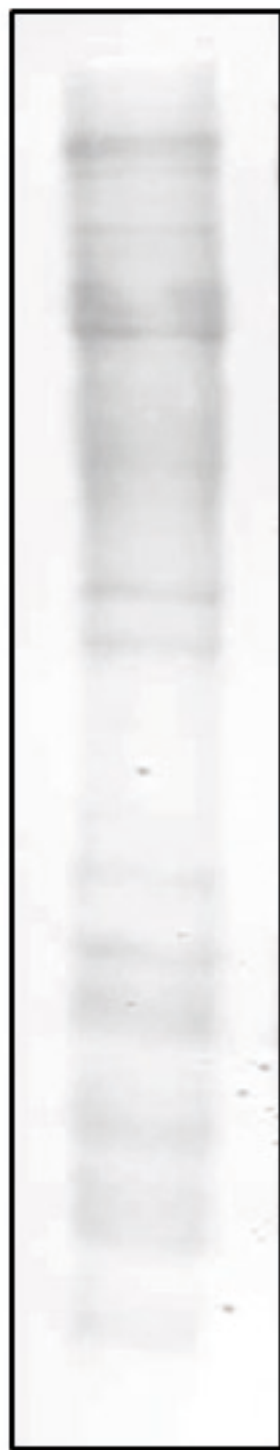

Supplement: pone.0167789.s002.pdf [file pone.0167789.s002.pdf]
