# Supplementary material for: Immunolocalization of a Histidine-Rich Epidermal Differentiation Protein in the Chicken Supports the Hypothesis of an Evolutionary Developmental Link between the Embryonic Subperiderm and Feather Barbs and Barbules
Source: PubMed Central journal article supplement (PMC5147990; doi:10.1371/journal.pone.0167789), 2016-12-09
Supplement: pone.0167789.s003.pdf [file pone.0167789.s003.pdf]

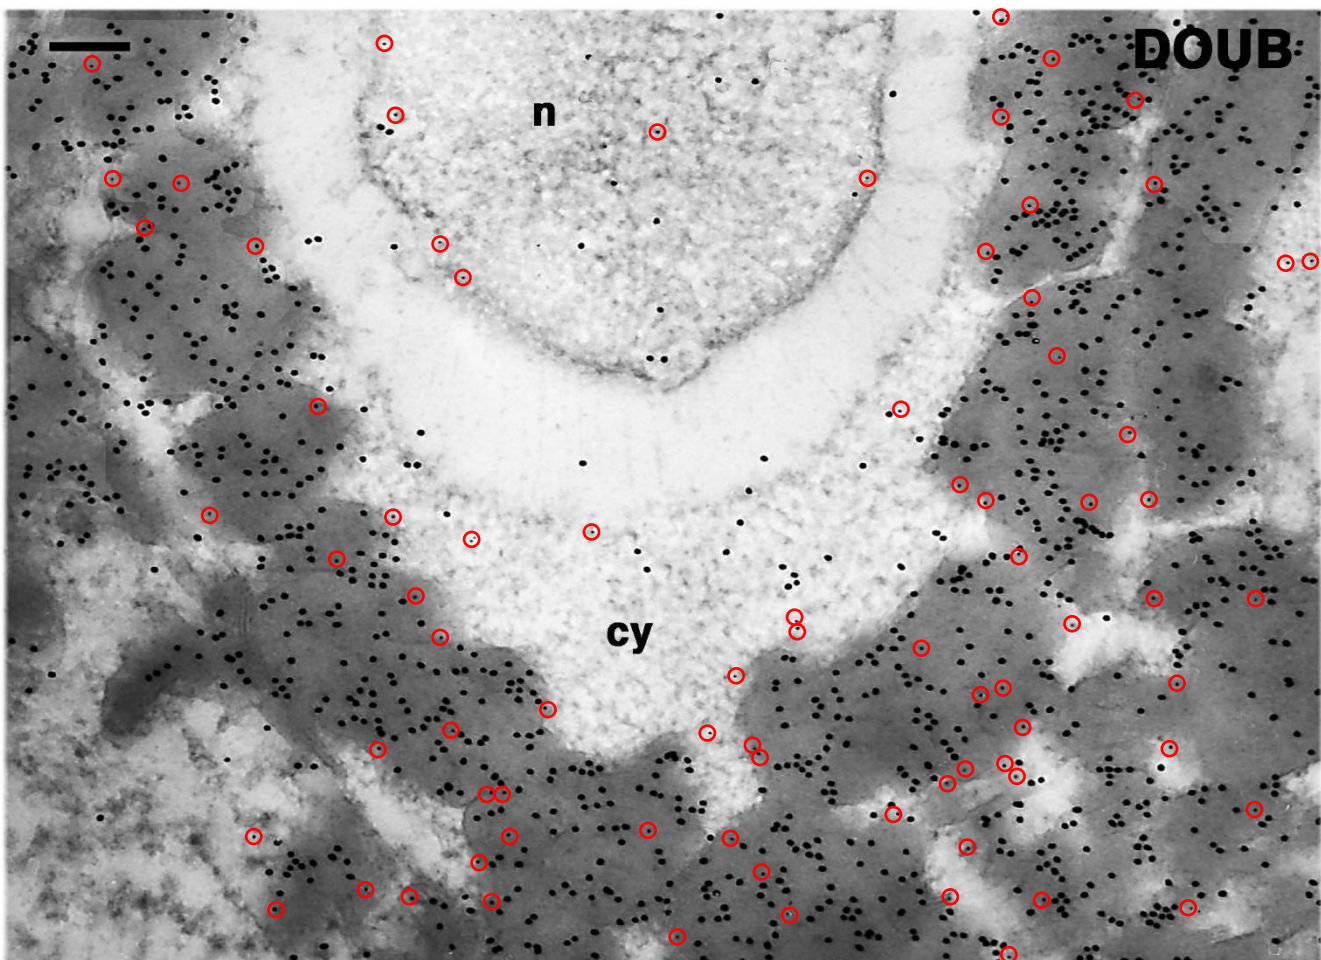

n

cy

DOUB
