# Supplementary material for: Immunolocalization of a Histidine-Rich Epidermal Differentiation Protein in the Chicken Supports the Hypothesis of an Evolutionary Developmental Link between the Embryonic Subperiderm and Feather Barbs and Barbules
Source: PubMed Central journal article supplement (PMC5147990; doi:10.1371/journal.pone.0167789), 2016-12-09
Supplement: pone.0167789.s004.pdf [file pone.0167789.s004.pdf]

# A

```

Gg_EDMTFH 1 MTFHREFYNDEHYSPFCQEDLHGLWGLNDHREKHL YGLHRDHHHDYNQHW
Hs_KAP7-1 1 MTRYFCCGSYFPGYPIYGTNFHGTFRATPLNCVVPLGSPLNYGCGCN---
          ** : . * .: ** : . . * :: *

Gg_EDMTFH 51 SPYGYNRSFGSLYGNRSLSSHGGYYGHGDFFGFGRHRHPYFSQFGHRYWY
Hs_KAP7-1 48 ---GYS-SLGYSFGGSNINNLGGCYGGSFYRPWGSG----SGFGYST-Y
          **. * * :* ..... ** ** : :* * **:. *

```

# B

## Gg\_EDMTFH

Number of amino acids: 99  
 Molecular weight: 12175.1  
 Theoretical pI: 6.94  
 Amino acid composition:

|                 |    |              |
|-----------------|----|--------------|
| Ala (A)         | 0  | 0.0%         |
| Arg (R)         | 7  | 7.1%         |
| Asn (N)         | 5  | 5.1%         |
| Asp (D)         | 6  | 6.1%         |
| Cys (C)         | 1  | 1.0%         |
| Gln (Q)         | 3  | 3.0%         |
| Glu (E)         | 3  | 3.0%         |
| Gly (G)         | 13 | 13.1%        |
| His (H)         | 15 | 15.2%        |
| Ile (I)         | 0  | 0.0%         |
| Leu (L)         | 7  | 7.1%         |
| Lys (K)         | 1  | 1.0%         |
| Met (M)         | 1  | 1.0%         |
| Phe (F)         | 10 | 10.1%        |
| Pro (P)         | 3  | 3.0%         |
| Ser (S)         | 8  | 8.1%         |
| Thr (T)         | 1  | 1.0%         |
| Trp (W)         | 3  | 3.0%         |
| Tyr (Y)         | 12 | 12.1%        |
| Val (V)         | 0  | 0.0%         |
| <b>Aromatic</b> |    | <b>40.4%</b> |

# C

## Hs\_KAP7-1

Number of amino acids: 87  
 Molecular weight: 9288.3  
 Theoretical pI: 8.57  
 Amino acid composition:

|                 |    |              |
|-----------------|----|--------------|
| Ala (A)         | 1  | 1.1%         |
| Arg (R)         | 3  | 3.4%         |
| Asn (N)         | 7  | 8.0%         |
| Asp (D)         | 0  | 0.0%         |
| Cys (C)         | 6  | 6.9%         |
| Gln (Q)         | 0  | 0.0%         |
| Glu (E)         | 0  | 0.0%         |
| Gly (G)         | 19 | 21.8%        |
| His (H)         | 1  | 1.1%         |
| Ile (I)         | 2  | 2.3%         |
| Leu (L)         | 5  | 5.7%         |
| Lys (K)         | 0  | 0.0%         |
| Met (M)         | 1  | 1.1%         |
| Phe (F)         | 7  | 8.0%         |
| Pro (P)         | 6  | 6.9%         |
| Ser (S)         | 10 | 11.5%        |
| Thr (T)         | 5  | 5.7%         |
| Trp (W)         | 1  | 1.1%         |
| Tyr (Y)         | 11 | 12.6%        |
| Val (V)         | 2  | 2.3%         |
| <b>Aromatic</b> |    | <b>22.8%</b> |
